# Supplementary material
Source: PubMed Central journal article supplement (PMC7485539)

Figure S1

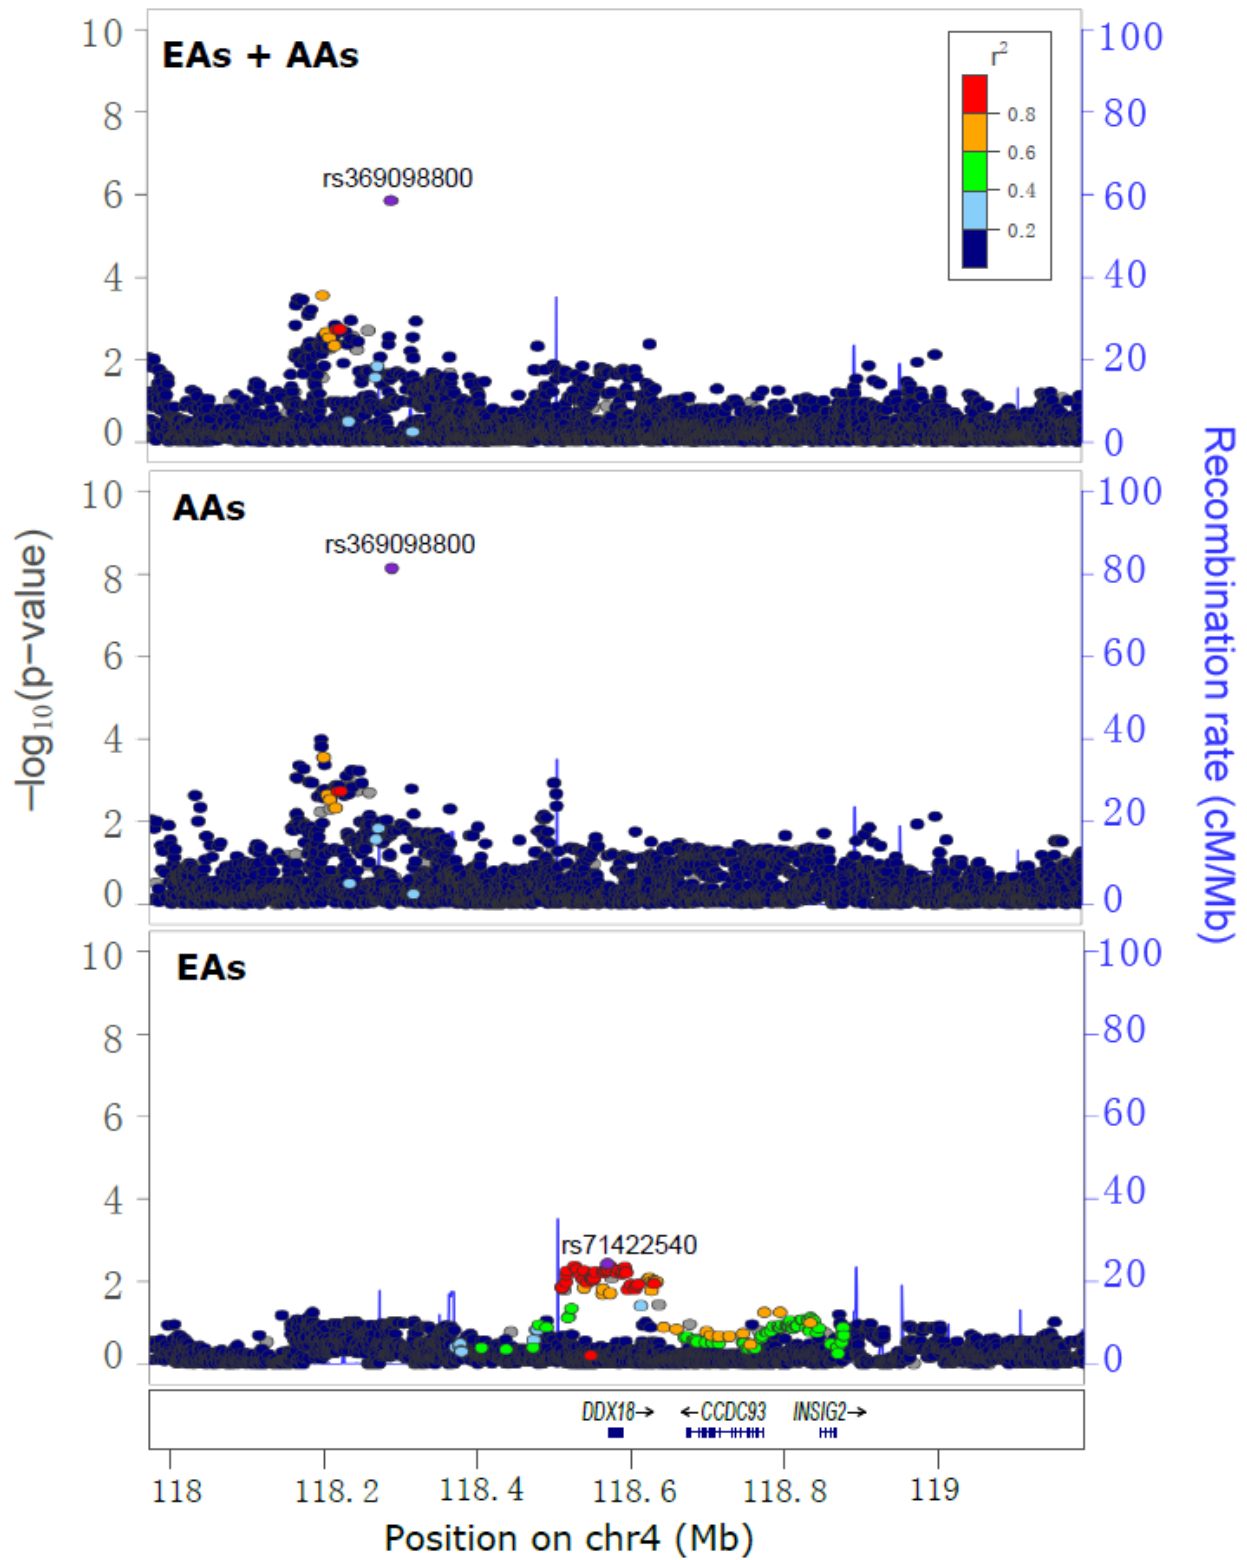

Figure S2

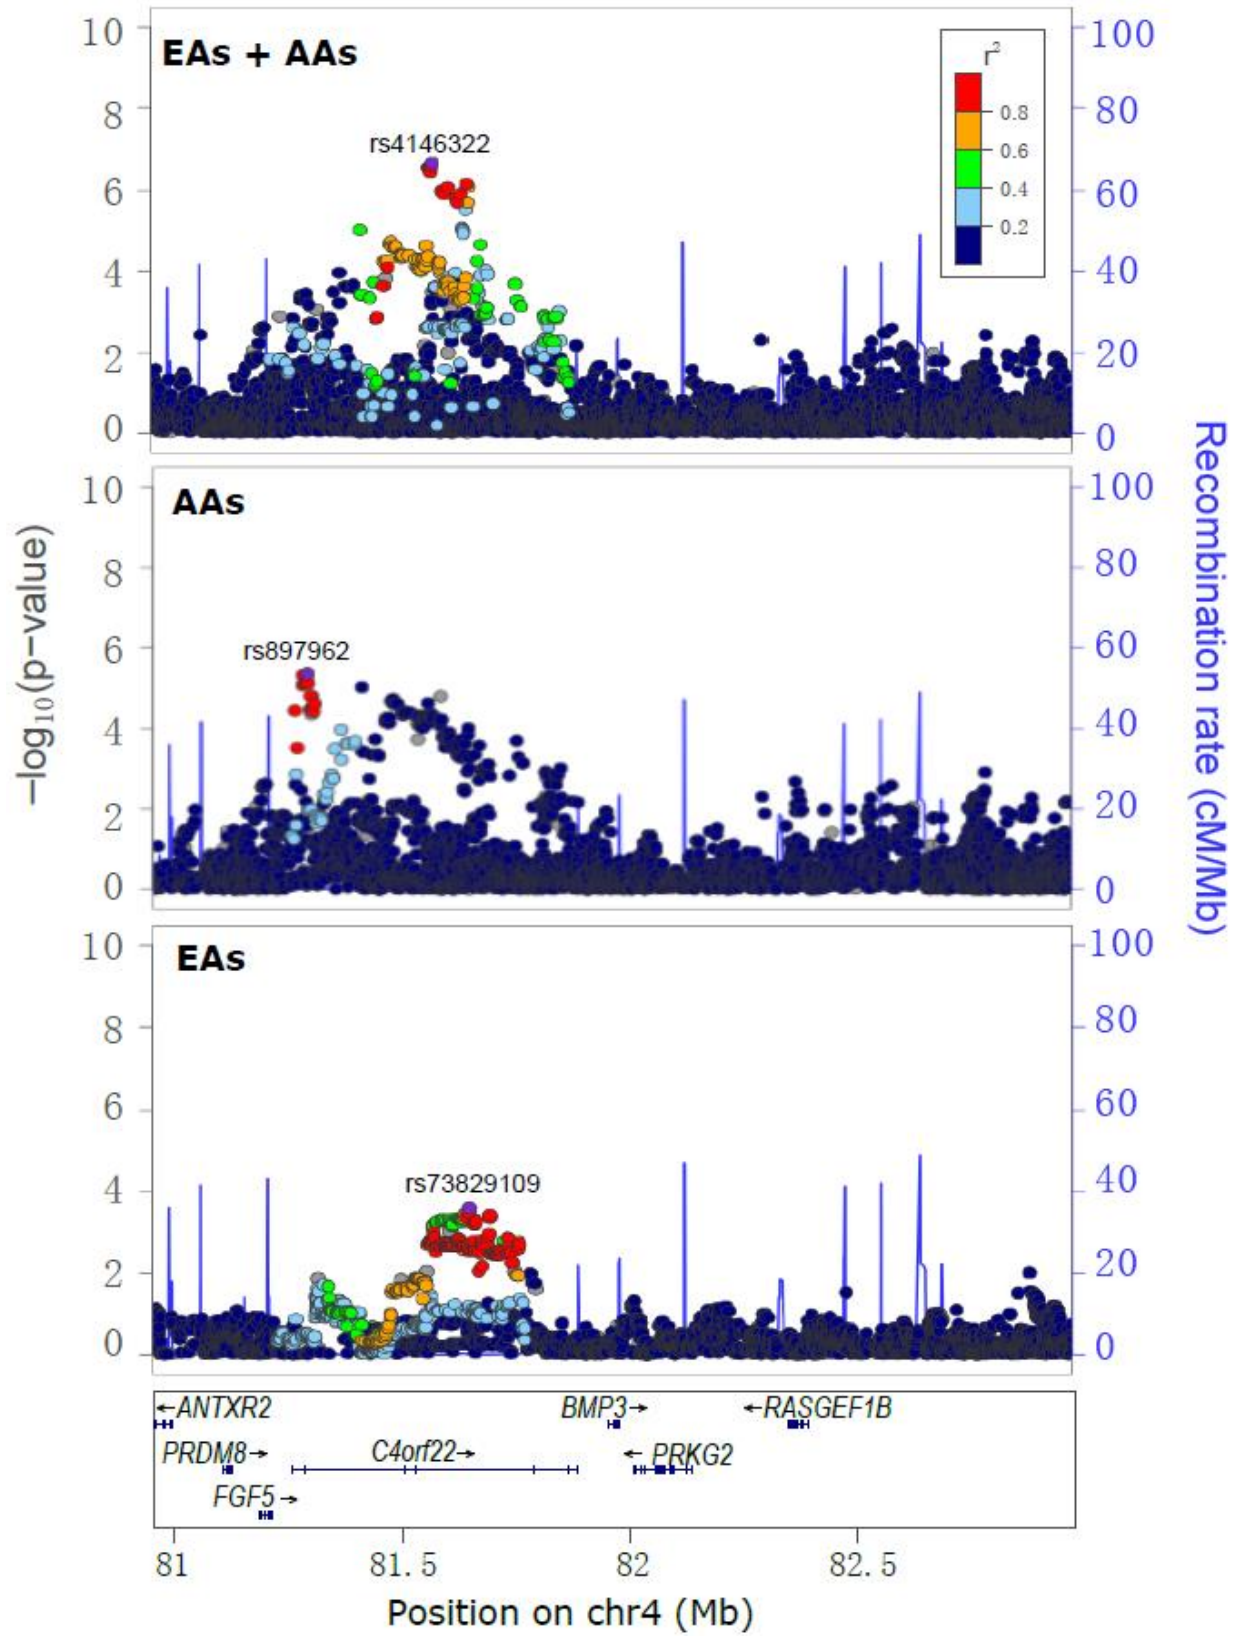

Figure S3

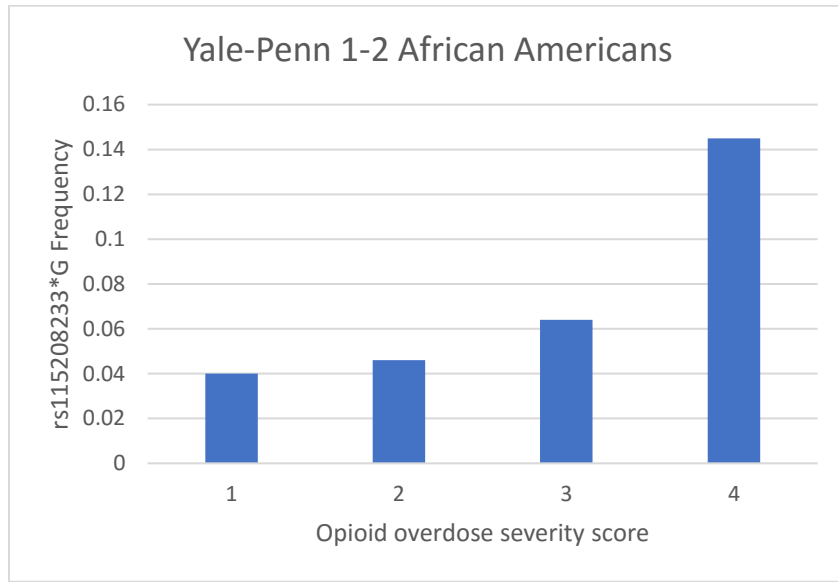

Figure S4

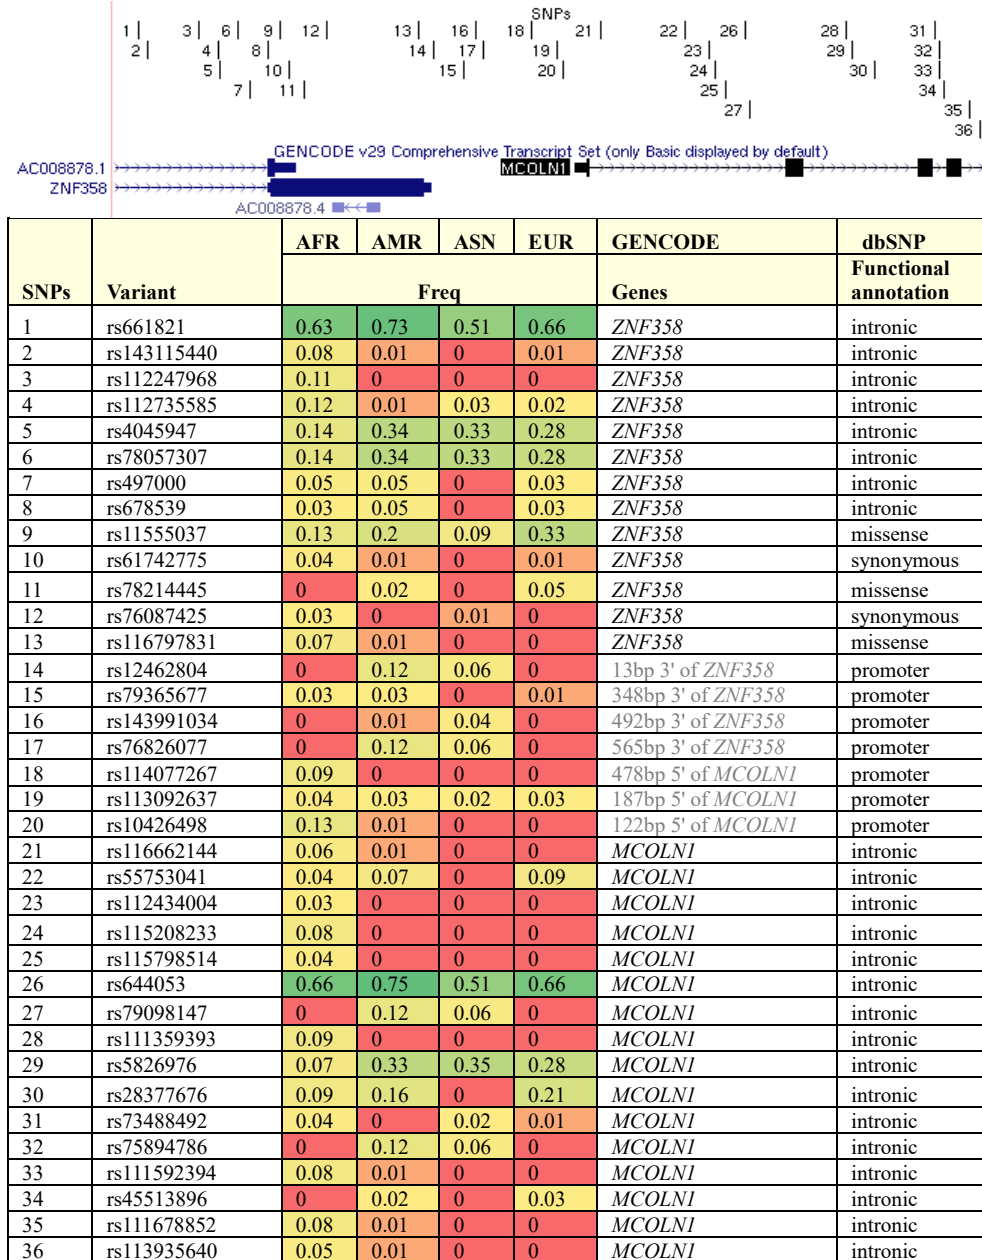

Supplement: NIHMS1602844-supplement-1.pdf [file NIHMS1602844-supplement-1.pdf]
